# Supplementary material for: Carbon Footprint of Mediterranean Pasture-Based Native Beef: Effects of Agronomic Practices and Pasture Management under Different Climate Change Scenarios
Source: MDPI journal article supplement (doi:10.3390/ani10030415), 2020-03-02
Supplement: s1 [file s1]

Supplementary Materials:

**Table S1.** Model input data for the baseline ryegrass-clover mix cultivation

| Crop                | Parameters                                                         | Baseline data         |
|---------------------|--------------------------------------------------------------------|-----------------------|
| Ryegrass-clover mix | Crop type                                                          | Annual grass          |
|                     | Fraction of leaves + stems left in field after harvest             | 0.1                   |
|                     | Max. aboveground biomass (kg C ha <sup>-1</sup> yr <sup>-1</sup> ) | 3,600                 |
|                     | Thermal degree days for maturity                                   | 1,350                 |
|                     | Water demand (g water/g DM)                                        | 115                   |
|                     | N fixation index (crop N/N from soil)                              | 1.5                   |
|                     | Optimum temperature (degree C)                                     | 21                    |
|                     | Tilling method                                                     | Deep ploughing (30cm) |
|                     | Tilling date (month-day)                                           | 9-15                  |
|                     | Manure amendment applied                                           | Compost               |
|                     | Manure amendment applying date (month-day)                         | 3-15                  |
|                     | Compost solid C/N ratio                                            | 14                    |
|                     | Organic C (kg C/ha)                                                | 700                   |
|                     | Organic N (kg N/ha)                                                | 50                    |
|                     | Compost application method                                         | Surface spread        |
|                     | Number of cuts                                                     | 1                     |
|                     | Cutting date (month-day)                                           | 5-15                  |
|                     | Cut part                                                           | Grain-leaf-stem       |
|                     | Cut fraction                                                       | 0.9                   |
|                     | Length of the cultivation                                          | 1 year                |

**Table S2.** Model input data for the baseline perennial grass grazed

| Crop                    | Parameters                                                         | Data             |
|-------------------------|--------------------------------------------------------------------|------------------|
| Perennial grass pasture | Crop type                                                          | Perennial grass  |
|                         | Max. aboveground biomass (kg C ha <sup>-1</sup> yr <sup>-1</sup> ) | 1,224            |
|                         | Thermal degree days for maturity                                   | 1,000            |
|                         | Water demand (g water/g DM)                                        | 200              |
|                         | N fixation index (crop N/N from soil)                              | 1.5              |
|                         | Optimum temperature (degree C)                                     | 21               |
|                         | Number of grazing applications                                     | 1                |
|                         | Grazing starting date (month-day)                                  | 1-12             |
|                         | Grazing ending date (month-day)                                    | 12-31            |
|                         | Grazing hours per day                                              | 8                |
|                         | Grazing intensity (heads ha <sup>-1</sup> )                        | 1.3              |
|                         | Additional feed (kg C head <sup>-1</sup> day <sup>-1</sup> )       | 3.2              |
|                         | Feed C/N                                                           | 20               |
|                         | Excreta handle                                                     | Deposit in field |

**Table S3.** Model soil input data

| Dedicated area          | Parameters                                                              | Data       |
|-------------------------|-------------------------------------------------------------------------|------------|
| Ryegrass-clover mix     | Top soil texture                                                        | Sandy-loam |
|                         | Bulk density (g cm <sup>-3</sup> )                                      | 1.3879     |
|                         | Soil pH                                                                 | 4.9        |
|                         | Field capacity (wfps)                                                   | 0.32       |
|                         | Wilting point (wfps)                                                    | 0.15       |
|                         | Clay fraction                                                           | 0.09       |
|                         | Hydro-conductivity (m hr <sup>-1</sup> )                                | 0.1248     |
|                         | Porosity (0-1)                                                          | 0.435      |
|                         | SOC at surface soil (0-10cm) (kg C/kg Soil)                             | 0.0085     |
|                         | Initial nitrate concentration at surface soil (mg N kg <sup>-1</sup> )  | 0.5        |
|                         | Initial ammonium concentration at surface soil (mg N kg <sup>-1</sup> ) | 0.05       |
| Perennial grass pasture | Top soil texture                                                        | Clay-loam  |
|                         | Bulk density (g cm <sup>-3</sup> )                                      | 1.1554     |
|                         | Soil pH                                                                 | 8.2        |
|                         | Field capacity (wfps)                                                   | 0.57       |
|                         | Wilting point (wfps)                                                    | 0.27       |
|                         | Clay fraction                                                           | 0.41       |
|                         | Hydro-conductivity (m hr <sup>-1</sup> )                                | 0.015      |
|                         | Porosity (0-1)                                                          | 0.476      |
|                         | SOC at surface soil (0-10cm) (kg C/kg Soil)                             | 0.0214     |
|                         | Initial nitrate concentration at surface soil (mg N kg <sup>-1</sup> )  | 0.5        |
|                         | Initial ammonium concentration at surface soil (mg N kg <sup>-1</sup> ) | 0.05       |

**Table S4.** Average herd data (2016-2018) used for the enteric methane estimation

| Parameters                                                                                  | Data  |
|---------------------------------------------------------------------------------------------|-------|
| Lactating cows (heads yr <sup>-1</sup> )                                                    | 146   |
| Heifers and steers on pasture (heads yr <sup>-1</sup> )                                     | 142   |
| Heifers and steers on fattening (heads yr <sup>-1</sup> )                                   | 12    |
| Lactating cows (NEm) (MJ day <sup>-1</sup> )                                                | 41.7  |
| Heifers and steers on pasture (NEm) (MJ day <sup>-1</sup> )                                 | 26.1  |
| Heifers and steers on fattening (NEm) (MJ day <sup>-1</sup> )                               | 36.6  |
| Herds (NEa) (MJ day <sup>-1</sup> )                                                         | 15    |
| Lactating cows (NEl) (MJ day <sup>-1</sup> )                                                | 8.5   |
| Pregnant cows (NEp) (MJ day <sup>-1</sup> )                                                 | 2.9   |
| Heifers and steers on pasture (NEg) (MJ day <sup>-1</sup> )                                 | 8.7   |
| Heifers and steers on fattening (NEg) (MJ day <sup>-1</sup> )                               | 18.2  |
| Digestible energy (DE) expressed as % of gross energy for the fattening animals             | 75    |
| Digestible energy (DE) expressed as % of gross energy for the rest of the herd              | 65    |
| Ratio of net energy available in a diet for maintenance to digestible energy consumed (REM) | 0.514 |
| Ratio of net energy available for growth in a diet to digestible energy consumed (REG)      | 0.308 |

**Table S5.** Life cycle inventory (LCI) data

| Table 33: Life cycle inventory (LCI) data |                                            |                           |                    |
|-------------------------------------------|--------------------------------------------|---------------------------|--------------------|
| Input                                     | Types                                      | Amount year <sup>-1</sup> |                    |
| Auxiliary products                        | Organic fertilizer                         | 312 t                     |                    |
|                                           | Packaging org. Fertilizer (LDPE)           | 624 kg                    |                    |
|                                           | Fuel                                       | 23,907 kg                 |                    |
|                                           | Ryegrass-clover seeds                      | 9,600 kg                  |                    |
|                                           | Packaging of ryegrass-clover seeds (paper) | 38 kg                     |                    |
|                                           | Extra farm feed                            | 30,100 kg                 |                    |
|                                           | Packaging of extra farm feed (paper)       | 181 kg                    |                    |
| Input                                     | Products                                   | Types of transport        | Distance (one way) |
| Transports                                | Organic fertilizer                         | Lorry 3.5-7.5t            | 424 km             |
|                                           | Fuel                                       | Lorry 7.5-16t             | 75 km              |
|                                           | Ryegrass-clover seeds                      | Lorry 3.5-7.5t            | 212 km             |
|                                           | Extra farm feed                            | Lorry 3.5-7.5t            | 321 km             |
|                                           | Waste                                      | Lorry 3.5-7.5t            | 50 km              |
| Input                                     | Types                                      | Nr.                       | Area               |
| Agricultural buildings                    | Barns                                      | 2                         | 300 mq             |
|                                           | Shed                                       | 1                         | 150 mq             |
| Agricultural machinery                    | Tractor                                    | 5                         |                    |
